# Supplementary material
Source: PubMed Central journal article supplement (PMC7759022)
Supplement: NIHMS1655380-supplement-1.pdf [file NIHMS1655380-supplement-1.pdf]

Supplementary Table 1. *Summary of covariates, cognitive and functional outcomes stratified by frailty status*

| <b>Attention/Executive Functioning</b> | Overall<br>Mean ( <i>SD</i> ) | Non-frail<br>Mean ( <i>SD</i> ) | Pre-frail<br>Mean ( <i>SD</i> ) | Frail<br>Mean ( <i>SD</i> ) |
|----------------------------------------|-------------------------------|---------------------------------|---------------------------------|-----------------------------|
| FAS                                    | 39.4 (13.8)                   | 41.4 (13.5)                     | 38.67 (14.0)                    | 34.00 (12.0)                |
| %ile ( <i>SS</i> )                     | 52                            | 59                              | 51                              | 41                          |
| CAT                                    | 41.0 (10.3)                   | 43.0 (10.3)                     | 40.2 (10.2)                     | 37.3 (9.40)                 |
| %ile ( <i>SS</i> )                     | 53                            | 67                              | 51                              | 42                          |
| DSST                                   | 51.9 (15.0)                   | 53.3 (15.0)                     | 51.2 (15.0)                     | 42.5 (10.3)                 |
| %ile ( <i>SS</i> )                     | 63-73                         | 63-73                           | 63-73                           | 37-47                       |
| <b>Verbal Memory</b>                   |                               |                                 |                                 |                             |
| List Learning                          | 22.6 (5.17)                   | 23.2 (5.23)                     | 22.4 (5.20)                     | 20.0 (3.56)                 |
| %ile ( <i>SS</i> )                     | 37-47                         | 37-47                           | 37-47                           | 25-34                       |
| List Recall                            | 3.99 (2.36)                   | 4.31 (2.31)                     | 3.94 (2.34)                     | 2.46 (2.13)                 |
| %ile ( <i>SS</i> )                     | 37-47                         | 50-61                           | 37-47                           | 25-34                       |
| <b>Premorbid</b>                       |                               |                                 |                                 |                             |
| AMNART                                 | 14.7 (10.1)                   | 13.3 (9.36)                     | 15.2 (10.3)                     | 18.3 (10.9)                 |
| %ile ( <i>SS</i> )                     | 63-73                         | 63-73                           | 63-73                           | 37-47                       |
| <b>Overall Cognition</b>               |                               |                                 |                                 |                             |
| RBANS                                  | 91.4 (12.0)                   | 92.8 (11.2)                     | 91.5 (12.3)                     | 84.5 (10.9)                 |
| %ile ( <i>SS</i> )                     | 27                            | 32                              | 27                              | 14                          |
| <b>Functional Outcomes</b>             |                               |                                 |                                 |                             |
| LLFDI-D                                | 69.2 (5.65)                   | 70.3 (4.89)                     | 68.8 (5.76)                     | 65.5 (6.97)                 |
| LLFDI-F                                | 63.7 (6.50)                   | 66.6 (6.58)                     | 62.7 (8.53)                     | 55.57 (11.1)                |
| <b>Covariates</b>                      |                               |                                 |                                 |                             |
| Age (years)                            | 76.5 (.495)                   | 75.8 (6.18)                     | 76.8 (6.70)                     | 78.1 (7.10)                 |
| Females: number (%)                    | 261 (57.1)                    | 105 (61.4)                      | 145 (56.2)                      | 11 (39.3)                   |
| Caucasian: number (%)                  | 79.9                          | 81.3                            | 79.1                            | 78.6                        |
| Education                              | 14.5 (3.08)                   | 14.8 (3.32)                     | 14.3 (2.91)                     | 14.3 (2.88)                 |

Note: Abbreviations: FAS, Letter Fluency Test; CAT, Category Fluency Test; DSST, Digit Symbol Substitution Test; AMNART, American National Adult Reading Test; RBANS, Repeatable Battery for the Assessment of Neuropsychological Status; LLFDI-D; LLFDI-F, Late Life Functioning and Disability Instrument (Disability and Functional).
